# Supplementary material for: Genotype to ecotype in niche environments: adaptation of Arthrobacter to carbon availability and environmental conditions
Source: PubMed Central journal article supplement (PMC9723602; doi:10.1038/s43705-022-00113-8), 2022-03-30
Supplement: 43705_2022_113_MOESM1_ESM.pdf [file 43705_2022_113_MOESM1_ESM.pdf]

## **Supplemental Information**

**Title:** Genotype to ecotype in niche environments: Adaptation of *Arthrobacter* to carbon availability and environmental conditions.

**Running title:** Genotype-to-ecotype comparison of *Arthrobacter* strains

**Authors:** Sara Gushgari-Doyle,<sup>1</sup> Lauren M. Lui,<sup>1</sup> Torben N. Nielsen,<sup>1</sup> Xiaoqin Wu,<sup>1</sup> Ria G. Malana,<sup>1</sup> Andrew J. Hendrickson<sup>1</sup>, Heloise Carion<sup>1</sup>, Farris L. Poole II,<sup>2</sup> Michael W.W. Adams,<sup>2</sup> Adam P. Arkin,<sup>1,3</sup> and Romy Chakraborty.<sup>1</sup>

**Affiliations:** <sup>1</sup>Lawrence Berkeley National Laboratory, Berkeley, CA; <sup>2</sup>Department of Biochemistry and Molecular Biology, University of Georgia, Athens, GA; <sup>3</sup>University of California, Berkeley, CA.

## Supplemental information on the use of Unicycler for assembling complete genomes

To generate a finished genome, it is necessary to have reads that are longer than the longest repeat. This precludes the use of only Illumina reads as they are typically 2 x 150 bp from the ends of a fragment that is approximately 500 bp long since most microbes we deal with have repeats that are longer than 500 bp. The ribosomal operon is a case in point; for most organisms with a copy number greater than one, it introduces a repeat of length ~7,000 bp. In order to generate a finished genome, we employed Oxford Nanopore Technologies (ONT) sequencing and got reads of sufficient length to span the repeats (see Supplementary Figure S1 for the long read length distributions of each sample).

Unicycler (Wick et al., 2017) generates an assembly by using the SPAdes assembler with varying kmer values to generate multiple short read assemblies. Out of these, Unicycler picks the one that reduces the complexity of the assembly graph the most. The short read assembly is accurate in terms of base calling errors, but fragmented. In the second phase, Unicycler uses the (less accurate) long reads to join the short reads together and resolve repeats where possible. Finally, Unicycler makes a determination as to which of the long pieces are circular (find long reads that span the contig ends) and it uses the short Illumina reads in a final polishing pass in an attempt to eliminate remaining errors and misassemblies using Pilon (Walker et al., 2014). Unicycler will also attempt to find a start gene on the circular pieces and if successful, it will rotate the piece to start with that gene (dnaA is typically used).

Generally, plasmids or phage show up as circular pieces that are significant smaller than the main chromosome and also lack ribosomal RNA.

Unicycler is a “short read first assembler” and given high Illumina coverage along with moderate nanopore read coverage, is able to produce finished genomes. There are also long read first assemblers. Flye (Kolmogorov et al., 2019) is the most popular of these that we are aware of and we commonly use it as a check on the Unicycler assemblies we generate. In most cases, the resulting assemblies appear equivalent and this provides a check on assembly quality.

### References:

- Kolmogorov, M., Yuan, J., Lin, Y., & Pevzner, P. A. (2019). Assembly of long, error-prone reads using repeat graphs. *Nature Biotechnology*, 37(5), 540–546.  
<https://doi.org/10.1038/s41587-019-0072-8>
- Walker, B. J., Abeel, T., Shea, T., Priest, M., Abouelliel, A., Sakthikumar, S., Cuomo, C. A., Zeng, Q., Wortman, J., & Young, S. K. (2014). Pilon: an integrated tool for comprehensive microbial variant detection and genome assembly improvement. *PLoS One*, 9(11), e112963.
- Wick, R. R., Judd, L. M., Gorrie, C. L., & Holt, K. E. (2017). Unicycler: resolving bacterial genome assemblies from short and long sequencing reads. *PLoS Computational Biology*, 13(6), e1005595.

Table S1. List of 58 carbon sources included in the carbon source utilization assay.

|                |
|----------------|
| cytosine       |
| thymidine      |
| inosine        |
| cytodine       |
| uridine        |
| adenosine      |
| adenine        |
| tryptophan     |
| arginine       |
| asparagine     |
| aspartate      |
| glutamate      |
| histidine      |
| glutamine      |
| cysteine       |
| tyrosine       |
| serine         |
| proline        |
| isoleucine     |
| methionine     |
| phenylalanine  |
| citrulline     |
| glucosamine    |
| casamino acids |
| xylitol        |
| mannitol       |
| ducitol        |
| myo-inositol   |
| acetate        |
| malate         |
| folate         |
| succinate      |
| propionate     |
| formate        |
| butyrate       |
| fumarate       |
| citrate        |
| lactate        |
| pyruvate       |
| glycolic acid  |
| nicotinic acid |
| phtalate       |
| sucrose        |
| glucose        |
| lactose        |
| ribose         |
| mannose        |
| fructose       |
| rhamnose       |
| maltose        |
| arabinose      |
| cellobiose     |
| cellulose      |
| glucuronamide  |
| urea           |
| tryptone       |
| R2A            |
| TSB            |

Table S2. Digital DNA-DNA Hybridization analysis on the seven isolate genomes.

Query genome: FW305-123

| Reference genome | Formula 1 |                |          |                  | Formula 2 |                |          |                  | Formula 3 |                |          |                  | G+C difference |
|------------------|-----------|----------------|----------|------------------|-----------|----------------|----------|------------------|-----------|----------------|----------|------------------|----------------|
|                  | DDH       | Model C.I.     | Distance | Prob. DDH >= 70% | DDH       | Model C.I.     | Distance | Prob. DDH >= 70% | DDH       | Model C.I.     | Distance | Prob. DDH >= 70% |                |
| FW305-123        | 100       | [100 - NaN%]   | 0        | 99.62            | 100       | [100 - NaN%]   | 0        | 98.3             | 100       | [100 - NaN%]   | 0        | 99.99            | 0              |
| FW306-07-I       | 18.2      | [15.1 - 21.7%] | 0.7648   | 0                | 20.9      | [18.6 - 23.3%] | 0.2105   | 0                | 17.8      | [15.2 - 20.8%] | 0.8143   | 0                | 3.49           |
| FW305-BF8        | 18.1      | [15 - 21.6%]   | 0.7673   | 0                | 21.3      | [19.1 - 23.7%] | 0.2059   | 0                | 17.8      | [15.1 - 20.8%] | 0.8153   | 0                | 3.8            |
| FW306-2-2C-D06B  | 21        | [17.8 - 24.6%] | 0.6861   | 0                | 20.9      | [18.7 - 23.4%] | 0.2098   | 0                | 20.1      | [17.3 - 23.1%] | 0.752    | 0                | 1.53           |
| FW306-04-A       | 20        | [16.8 - 23.6%] | 0.7114   | 0                | 21.2      | [19 - 23.6%]   | 0.2071   | 0                | 19.3      | [16.6 - 22.4%] | 0.7712   | 0                | 1.28           |
| FW306-05-C       | 18.1      | [15 - 21.6%]   | 0.7673   | 0                | 20.8      | [18.6 - 23.3%] | 0.2108   | 0                | 17.7      | [15.1 - 20.7%] | 0.8164   | 0                | 3.53           |
| FW306-06-A       | 17.8      | [14.7 - 21.3%] | 0.778    | 0                | 20.9      | [18.7 - 23.3%] | 0.2103   | 0                | 17.5      | [14.9 - 20.4%] | 0.8247   | 0                | 3.57           |

Query genome: FW305-BF8

| Reference genome | Formula 1 |                |          |                  | Formula 2 |                |          |                  | Formula 3 |                |          |                  | G+C difference |
|------------------|-----------|----------------|----------|------------------|-----------|----------------|----------|------------------|-----------|----------------|----------|------------------|----------------|
|                  | DDH       | Model C.I.     | Distance | Prob. DDH >= 70% | DDH       | Model C.I.     | Distance | Prob. DDH >= 70% | DDH       | Model C.I.     | Distance | Prob. DDH >= 70% |                |
| FW305-123        | 18.1      | [15 - 21.6%]   | 0.7673   | 0                | 21.3      | [19.1 - 23.7%] | 0.2059   | 0                | 17.8      | [15.1 - 20.8%] | 0.8153   | 0                | 3.8            |
| FW306-07-I       | 23.8      | [20.5 - 27.4%] | 0.6227   | 0.01             | 22.6      | [20.3 - 25%]   | 0.1941   | 0                | 22.5      | [19.7 - 25.6%] | 0.6959   | 0                | 0.31           |
| FW305-BF8        | 100       | [100 - NaN%]   | 0        | 99.62            | 100       | [100 - NaN%]   | 0        | 98.3             | 100       | [100 - NaN%]   | 0        | 99.99            | 0              |
| FW306-2-2C-D06B  | 19        | [15.8 - 22.6%] | 0.7404   | 0                | 22.1      | [19.8 - 24.5%] | 0.1988   | 0                | 18.6      | [15.9 - 21.6%] | 0.7921   | 0                | 2.27           |
| FW306-04-A       | 18.8      | [15.7 - 22.4%] | 0.7441   | 0                | 21.7      | [19.5 - 24.1%] | 0.2021   | 0                | 18.4      | [15.8 - 21.5%] | 0.7959   | 0                | 2.52           |
| FW306-05-C       | 23.8      | [20.5 - 27.5%] | 0.6211   | 0.01             | 22.5      | [20.2 - 24.9%] | 0.1952   | 0                | 22.5      | [19.7 - 25.6%] | 0.695    | 0                | 0.27           |
| FW306-06-A       | 23.7      | [20.4 - 27.3%] | 0.6243   | 0.01             | 22.6      | [20.3 - 25%]   | 0.194    | 0                | 22.4      | [19.6 - 25.5%] | 0.6971   | 0                | 0.23           |

Query genome: FW306-2-2C-D06B

| Reference genome | Formula 1 |                |          |                  | Formula 2 |                |          |                  | Formula 3 |                |          |                  | G+C difference |
|------------------|-----------|----------------|----------|------------------|-----------|----------------|----------|------------------|-----------|----------------|----------|------------------|----------------|
|                  | DDH       | Model C.I.     | Distance | Prob. DDH >= 70% | DDH       | Model C.I.     | Distance | Prob. DDH >= 70% | DDH       | Model C.I.     | Distance | Prob. DDH >= 70% |                |
| FW305-123        | 21        | [17.8 - 24.6%] | 0.6861   | 0                | 20.9      | [18.7 - 23.4%] | 0.2098   | 0                | 20.1      | [17.3 - 23.1%] | 0.752    | 0                | 1.53           |
| FW306-07-I       | 18.2      | [15.1 - 21.8%] | 0.7633   | 0                | 21.5      | [19.3 - 24%]   | 0.2037   | 0                | 17.9      | [15.3 - 20.9%] | 0.8115   | 0                | 1.96           |
| FW305-BF8        | 19        | [15.8 - 22.6%] | 0.7404   | 0                | 22.1      | [19.8 - 24.5%] | 0.1988   | 0                | 18.6      | [15.9 - 21.6%] | 0.7921   | 0                | 2.27           |
| FW306-2-2C-D06B  | 100       | [100 - NaN%]   | 0        | 99.62            | 100       | [100 - NaN%]   | 0        | 98.3             | 100       | [100 - NaN%]   | 0        | 99.99            | 0              |
| FW306-04-A       | 56.7      | [53.1 - 60.2%] | 0.2606   | 30.39            | 33.8      | [31.4 - 36.4%] | 0.1232   | 0.45             | 50.8      | [47.7 - 53.8%] | 0.3517   | 3.43             | 0.26           |
| FW306-05-C       | 18.3      | [15.2 - 21.9%] | 0.7608   | 0                | 21.6      | [19.4 - 24.1%] | 0.2029   | 0                | 18        | [15.3 - 21%]   | 0.8093   | 0                | 2              |
| FW306-06-A       | 18.2      | [15.1 - 21.7%] | 0.7649   | 0                | 21.7      | [19.4 - 24.1%] | 0.2022   | 0                | 17.9      | [15.2 - 20.9%] | 0.8125   | 0                | 2.04           |

### Query genome: FW306-04-A

| Reference genome | Formula 1 |                |          |                  | Formula 2 |                |          |                  | Formula 3 |                |          |                  | G+C difference |
|------------------|-----------|----------------|----------|------------------|-----------|----------------|----------|------------------|-----------|----------------|----------|------------------|----------------|
|                  | DDH       | Model C.I.     | Distance | Prob. DDH >= 70% | DDH       | Model C.I.     | Distance | Prob. DDH >= 70% | DDH       | Model C.I.     | Distance | Prob. DDH >= 70% |                |
| FW305-123        | 20        | [16.8 - 23.6%] | 0.7114   | 0                | 21.2      | [19 - 23.6%]   | 0.2071   | 0                | 19.3      | [16.6 - 22.4%] | 0.7712   | 0                | 1.28           |
| FW306-07-I       | 18.1      | [15.1 - 21.7%] | 0.7655   | 0                | 21.5      | [19.2 - 23.9%] | 0.2045   | 0                | 17.8      | [15.2 - 20.8%] | 0.8135   | 0                | 2.21           |
| FW305-BF8        | 18.8      | [15.7 - 22.4%] | 0.7441   | 0                | 21.7      | [19.5 - 24.1%] | 0.2021   | 0                | 18.4      | [15.8 - 21.5%] | 0.7959   | 0                | 2.52           |
| FW306-2-2C-D06B  | 56.7      | [53.1 - 60.2%] | 0.2606   | 30.39            | 33.8      | [31.4 - 36.4%] | 0.1232   | 0.45             | 50.8      | [47.7 - 53.8%] | 0.3517   | 3.43             | 0.26           |
| FW306-04-A       | 100       | [100 - NaN%]   | 0        | 99.62            | 100       | [100 - NaN%]   | 0        | 98.3             | 100       | [100 - NaN%]   | 0        | 99.99            | 0              |
| FW306-05-C       | 18.1      | [15 - 21.6%]   | 0.7682   | 0                | 21.5      | [19.3 - 23.9%] | 0.2041   | 0                | 17.8      | [15.1 - 20.8%] | 0.8155   | 0                | 2.25           |
| FW306-06-A       | 18.1      | [15 - 21.6%]   | 0.7679   | 0                | 21.4      | [19.2 - 23.8%] | 0.205    | 0                | 17.8      | [15.1 - 20.8%] | 0.8155   | 0                | 2.29           |

### Query genome: FW306-05-C

| Reference genome | Formula 1 |                |          |                  | Formula 2 |                |          |                  | Formula 3 |                |          |                  | G+C difference |
|------------------|-----------|----------------|----------|------------------|-----------|----------------|----------|------------------|-----------|----------------|----------|------------------|----------------|
|                  | DDH       | Model C.I.     | Distance | Prob. DDH >= 70% | DDH       | Model C.I.     | Distance | Prob. DDH >= 70% | DDH       | Model C.I.     | Distance | Prob. DDH >= 70% |                |
| FW305-123        | 18.1      | [15 - 21.6%]   | 0.7673   | 0                | 20.8      | [18.6 - 23.3%] | 0.2108   | 0                | 17.7      | [15.1 - 20.7%] | 0.8164   | 0                | 3.53           |
| FW306-07-I       | 90.5      | [87.3 - 92.9%] | 0.0782   | 97.46            | 90        | [87.6 - 91.9%] | 0.0122   | 95.78            | 92.9      | [90.6 - 94.7%] | 0.0894   | 99.71            | 0.04           |
| FW305-BF8        | 23.8      | [20.5 - 27.5%] | 0.6211   | 0.01             | 22.5      | [20.2 - 24.9%] | 0.1952   | 0                | 22.5      | [19.7 - 25.6%] | 0.695    | 0                | 0.27           |
| FW306-2-2C-D06B  | 18.3      | [15.2 - 21.9%] | 0.7608   | 0                | 21.6      | [19.4 - 24.1%] | 0.2029   | 0                | 18        | [15.3 - 21%]   | 0.8093   | 0                | 2              |
| FW306-04-A       | 18.1      | [15 - 21.6%]   | 0.7682   | 0                | 21.5      | [19.3 - 23.9%] | 0.2041   | 0                | 17.8      | [15.1 - 20.8%] | 0.8155   | 0                | 2.25           |
| FW306-05-C       | 100       | [100 - NaN%]   | 0        | 99.62            | 100       | [100 - NaN%]   | 0        | 98.3             | 100       | [100 - NaN%]   | 0        | 99.99            | 0              |
| FW306-06-A       | 87.3      | [83.7 - 90.1%] | 0.0955   | 96.16            | 87.5      | [84.9 - 89.7%] | 0.0149   | 94.86            | 90.1      | [87.3 - 92.3%] | 0.109    | 99.43            | 0.04           |

### Query genome: FW306-06-A

| Reference genome | Formula 1 |                |          |                  | Formula 2 |                |          |                  | Formula 3 |                |          |                  | G+C difference |
|------------------|-----------|----------------|----------|------------------|-----------|----------------|----------|------------------|-----------|----------------|----------|------------------|----------------|
|                  | DDH       | Model C.I.     | Distance | Prob. DDH >= 70% | DDH       | Model C.I.     | Distance | Prob. DDH >= 70% | DDH       | Model C.I.     | Distance | Prob. DDH >= 70% |                |
| FW305-123        | 17.8      | [14.7 - 21.3%] | 0.778    | 0                | 20.9      | [18.7 - 23.3%] | 0.2103   | 0                | 17.5      | [14.9 - 20.4%] | 0.8247   | 0                | 3.57           |
| FW306-07-I       | 87.9      | [84.5 - 90.7%] | 0.0919   | 96.47            | 87.9      | [85.4 - 90%]   | 0.0144   | 95.02            | 90.7      | [88 - 92.8%]   | 0.105    | 99.5             | 0.08           |
| FW305-BF8        | 23.7      | [20.4 - 27.3%] | 0.6243   | 0.01             | 22.6      | [20.3 - 25%]   | 0.194    | 0                | 22.4      | [19.6 - 25.5%] | 0.6971   | 0                | 0.23           |
| FW306-2-2C-D06B  | 18.2      | [15.1 - 21.7%] | 0.7649   | 0                | 21.7      | [19.4 - 24.1%] | 0.2022   | 0                | 17.9      | [15.2 - 20.9%] | 0.8125   | 0                | 2.04           |
| FW306-04-A       | 18.1      | [15 - 21.6%]   | 0.7679   | 0                | 21.4      | [19.2 - 23.8%] | 0.205    | 0                | 17.8      | [15.1 - 20.8%] | 0.8155   | 0                | 2.29           |
| FW306-05-C       | 87.3      | [83.7 - 90.1%] | 0.0955   | 96.16            | 87.5      | [84.9 - 89.7%] | 0.0149   | 94.86            | 90.1      | [87.3 - 92.3%] | 0.109    | 99.43            | 0.04           |
| FW306-06-A       | 100       | [100 - NaN%]   | 0        | 99.62            | 100       | [100 - NaN%]   | 0        | 98.3             | 100       | [100 - NaN%]   | 0        | 99.99            | 0              |

### Query genome: FW306-07-I

| Reference genome | Formula 1 |                |          |                  | Formula 2 |                |          |                  | Formula 3 |                |          |                  | G+C difference |
|------------------|-----------|----------------|----------|------------------|-----------|----------------|----------|------------------|-----------|----------------|----------|------------------|----------------|
|                  | DDH       | Model C.I.     | Distance | Prob. DDH >= 70% | DDH       | Model C.I.     | Distance | Prob. DDH >= 70% | DDH       | Model C.I.     | Distance | Prob. DDH >= 70% |                |
| FW305-123        | 18.2      | [15.1 - 21.7%] | 0.7648   | 0                | 20.9      | [18.6 - 23.3%] | 0.2105   | 0                | 17.8      | [15.2 - 20.8%] | 0.8143   | 0                | 3.49           |
| FW305-BF8        | 23.8      | [20.5 - 27.4%] | 0.6227   | 0.01             | 22.6      | [20.3 - 25%]   | 0.1941   | 0                | 22.5      | [19.7 - 25.6%] | 0.6959   | 0                | 0.31           |
| FW306-2-2C-D06B  | 18.2      | [15.1 - 21.8%] | 0.7633   | 0                | 21.5      | [19.3 - 24%]   | 0.2037   | 0                | 17.9      | [15.3 - 20.9%] | 0.8115   | 0                | 1.96           |
| FW306-04-A       | 18.1      | [15.1 - 21.7%] | 0.7655   | 0                | 21.5      | [19.2 - 23.9%] | 0.2045   | 0                | 17.8      | [15.2 - 20.8%] | 0.8135   | 0                | 2.21           |
| FW306-05-C       | 90.5      | [87.3 - 92.9%] | 0.0782   | 97.46            | 90        | [87.6 - 91.9%] | 0.0122   | 95.78            | 92.9      | [90.6 - 94.7%] | 0.0894   | 99.71            | 0.04           |
| FW306-06-A       | 87.9      | [84.5 - 90.7%] | 0.0919   | 96.47            | 87.9      | [85.4 - 90%]   | 0.0144   | 95.02            | 90.7      | [88 - 92.8%]   | 0.105    | 99.5             | 0.08           |
| FW306-07-I       | 100       | [100 - NaN%]   | 0        | 99.62            | 100       | [100 - NaN%]   | 0        | 98.3             | 100       | [100 - NaN%]   | 0        | 99.99            | 0              |

Table S3. Genes found in the predicted genomic islands for each of the seven isolates and the start and end locations of each gene in the genome (bp). Genes annotated as hypothetical proteins were not included in this table.

| Gene product                                                    | Gene start | Gene end |
|-----------------------------------------------------------------|------------|----------|
| <b>FW305-123</b>                                                |            |          |
| Chloramphenicol efflux pump                                     | 4778823    | 4780049  |
| D-inositol-3-phosphate glycosyltransferase                      | 4783223    | 4784314  |
| HTH-type transcriptional repressor GlcR                         | 7409738    | 7410529  |
| 3-oxo-isoapionate kinase                                        | 7411530    | 7412831  |
| Putative KHG/KDPG aldolase                                      | 7413832    | 7414473  |
| ATP-dependent Clp protease ATP-binding subunit ClpL             | 7417374    | 7419140  |
| Dihydroantcapsin 7-dehydrogenase                                | 7420141    | 7420890  |
| Adaptive-response sensory-kinase SasA                           | 7421891    | 7423597  |
| Glucosamine-6-phosphate deaminase                               | 7429178    | 7429969  |
| Putative glyoxylase CFP32                                       | 7435422    | 7436204  |
| Bacitracin transport ATP-binding protein BcrA                   | 7438742    | 7439452  |
| Arabinose metabolism transcriptional repressor                  | 7443764    | 7444912  |
| Alpha-ketoglutarate permease                                    | 7445913    | 7447214  |
| Hydrogen cyanide synthase subunit HcnC                          | 7449560    | 7450828  |
| Fosfomycin resistance protein AbaF                              | 7453363    | 7454706  |
| Ribosome maturation factor RimP                                 | 7459894    | 7460505  |
| HTH-type transcriptional repressor YtrA                         | 7801190    | 7801579  |
| HTH-type transcriptional regulator SutR                         | 8419642    | 8420241  |
| putative acyl--CoA ligase YhfT                                  | 8421242    | 8422633  |
| HTH-type transcriptional regulator DegA                         | 8428382    | 8429434  |
| 2-succinyl-6-hydroxy-2, 4-cyclohexadiene-1-carboxylate synthase | 8430435    | 8431274  |
| Gluconolactonase                                                | 8434166    | 8435047  |
| <b>FW305-BF8</b>                                                |            |          |
| HTH-type transcriptional regulator KipR                         | 3024922    | 3025674  |
| IS30 family transposase ISCmi3                                  | 3479258    | 3479794  |
| Hypoxic response protein 1                                      | 3482053    | 3482469  |
| Peptidyl-tRNA hydrolase                                         | 3484803    | 3485387  |
| RNA polymerase-binding transcription factor DksA                | 4113559    | 4113912  |
| Muconolactone Delta-isomerase                                   | 4116234    | 4116512  |
| Deacetylase                                                     | 4118852    | 4120042  |
| D-methionine transport system permease protein MetI             | 4122553    | 4123224  |
| Melibiose/raffinose/stachyose import permease protein MelC      | 4124225    | 4125115  |
| Fosfomycin resistance protein AbaF                              | 4126116    | 4127477  |

|                                                                 |         |         |
|-----------------------------------------------------------------|---------|---------|
| Bifunctional protein FOLD protein                               | 4128478 | 4129356 |
| Aspartate-semialdehyde dehydrogenase                            | 4130357 | 4131499 |
| D-inositol 3-phosphate glycosyltransferase                      | 4132500 | 4133756 |
| Tyrosine recombinase XerC                                       | 4134757 | 4135629 |
| PEP-dependent dihydroxyacetone kinase, ADP-binding subunit DhaL | 4136630 | 4137256 |
| Phosphatidylinositol phosphate synthase                         | 4145318 | 4145938 |
| NAD-dependent glycerol dehydrogenase                            | 4146939 | 4147685 |
| NADH pyrophosphatase                                            | 4152021 | 4153073 |
| D-alanine aminotransferase                                      | 4154074 | 4155006 |
| Sorbitol dehydrogenase                                          | 4157727 | 4158806 |
| Ammonia channel                                                 | 4159807 | 4161177 |
| Cell division protein FtsQ                                      | 4165867 | 4167030 |
| Molybdenum import ATP-binding protein ModC                      | 4169961 | 4171010 |
| Cold shock protein                                              | 4173380 | 4173583 |
| Transcriptional regulatory protein YpdB                         | 4177517 | 4178236 |
| Multidrug resistance protein MdtH                               | 4179237 | 4180430 |
| Putative multidrug resistance protein MdtD                      | 4184559 | 4185950 |
| Gluconate 5-dehydrogenase                                       | 4193173 | 4193943 |
| Putative fluoride ion transporter CrcB                          | 4194944 | 4195309 |
| Leucine efflux protein                                          | 4197778 | 4198413 |
| Putative agmatine deiminase                                     | 4199414 | 4200388 |
| L-threonine 3-dehydrogenase                                     | 5279857 | 5280864 |
| IS21 family transposase IS1415                                  | 5281865 | 5282650 |
| Alkyl hydroperoxide reductase E                                 | 5286632 | 5287135 |
| Serine hydroxymethyltransferase 2                               | 5288136 | 5289476 |
| Thiol:disulfide interchange protein DsbD                        | 5290477 | 5291226 |
| Protease PrtS                                                   | 5294073 | 5295113 |
| putative multidrug resistance protein EmrY                      | 5296114 | 5297625 |
| putative sugar epimerase YhfK                                   | 5298626 | 5299297 |
| 3-oxoacyl-[acyl-carrier-protein] reductase FabG                 | 5306253 | 5307029 |
| Transcriptional regulatory protein CitT                         | 5308030 | 5308698 |
| Vitamin B12 import ATP-binding protein BtuD                     | 5314018 | 5314944 |
| putative transcriptional regulatory protein TcrX                | 5323714 | 5324454 |
| DNA ligase C                                                    | 8004087 | 8005154 |
| Maltose O-acetyltransferase                                     | 8006155 | 8006733 |
| Glutathione-independent formaldehyde dehydrogenase              | 8011946 | 8013094 |
| IS481 family transposase ISArsp1                                | 8015353 | 8016330 |
| putative trans-aconitate 2-methyltransferase                    | 8017331 | 8018104 |
| putative protein YyaP                                           | 8904047 | 8904646 |

|                                                             |         |         |
|-------------------------------------------------------------|---------|---------|
| NADPH dehydrogenase                                         | 8907433 | 8909568 |
| Molybdate-binding protein ModA                              | 8910569 | 8911372 |
| Na(+)/H(+) antiporter NhaA                                  | 8922848 | 8924200 |
| <b>FW306-2-2C-D06B</b>                                      |         |         |
| Phage shock protein A                                       | 966796  | 967584  |
| putative oxidoreductase/MSMEI_2347                          | 968585  | 969430  |
| putative enoyl-CoA hydratase echA8                          | 970431  | 971210  |
| putative 3-hydroxyisobutyrate dehydrogenase                 | 972211  | 973131  |
| Acyl-CoA dehydrogenase                                      | 974132  | 975268  |
| Electron transfer flavoprotein subunit beta                 | 978202  | 978969  |
| Catabolite control protein A                                | 3300451 | 3301506 |
| Ferredoxin--NADP reductase                                  | 4392419 | 4394137 |
| Hydroxyacylglutathione hydrolase                            | 4395138 | 4396196 |
| Putative aminoacrylate hydrolase RutD                       | 4397197 | 4398063 |
| Acyl-coenzyme A thioesterase Paal                           | 4404813 | 4405295 |
| HTH-type transcriptional regulator DegA                     | 4406296 | 4407357 |
| Leucine-responsive regulatory protein                       | 4408358 | 4408810 |
| Nitric oxide reductase FIRd-NAD(+) reductase                | 4409811 | 4410908 |
| Bifunctional riboflavin kinase/FMN adenylyltransferase      | 4411909 | 4412892 |
| Putative 4-hydroxy-4-methyl-2-oxoglutarate aldolase         | 4641783 | 4642265 |
| Urocanate hydratase                                         | 4643266 | 4644993 |
| Multidrug efflux system permease protein                    | 5453995 | 5455617 |
| Protoporphyrinogen oxidase                                  | 6272990 | 6274459 |
| p-aminobenzoyl-glutamate hydrolase subunit B                | 6276580 | 6278199 |
| IS481 family transposase ISMyp5                             | 6279200 | 6280198 |
| Diacetylchitobiose uptake system permease protein NgcG      | 6284537 | 6285475 |
| <b>FW306-04-A</b>                                           |         |         |
| Guanine deaminase                                           | 2456826 | 2457311 |
| Cold shock protein                                          | 2468819 | 2469022 |
| 3-methyl-2-oxobutanoate dehydrogenase subunit beta          | 2665026 | 2666060 |
| Oxygen sensor histidine kinase response regulator DevS/DosS | 2667061 | 2668779 |
| Nitrite reductase (NADH) small subunit                      | 2677936 | 2678307 |
| Undecaprenyl-diphosphatase                                  | 2680530 | 2681399 |
| Ribokinase                                                  | 2686436 | 2687542 |
| Biotin carboxylase                                          | 2688543 | 2689895 |
| Chaperone protein DnaJ                                      | 4377544 | 4378065 |
| ATP-dependent DNA helicase Rep                              | 4380717 | 4383491 |
| Iron-sulfur cluster carrier protein                         | 5019352 | 5020551 |
| IS30 family transposase ISPfr16                             | 5919310 | 5920491 |



|                                                                            |         |         |
|----------------------------------------------------------------------------|---------|---------|
| Uric acid degradation bifunctional protein                                 | 5923443 | 5923970 |
| Putative multidrug resistance protein MdtD                                 | 5926985 | 5929024 |
| Thiol:disulfide interchange protein DsbD                                   | 5931826 | 5932581 |
| Alanine dehydrogenase                                                      | 5934915 | 5936033 |
| Multidrug resistance protein MdtH                                          | 6422036 | 6423076 |
| Exodeoxyribonuclease 7 small subunit                                       | 6428970 | 6429212 |
| <b>FW306-05-C</b>                                                          |         |         |
| Tyrosine recombinase XerC                                                  | 3750475 | 3752460 |
| Putative glyoxylase CFP32                                                  | 3753461 | 3754234 |
| Universal stress protein                                                   | 3757684 | 3758136 |
| NADP-dependent fatty aldehyde dehydrogenase                                | 3771872 | 3773323 |
| Vanillate/3-O-methylgallate O-demethylase                                  | 3777578 | 3778990 |
| Cobalt/magnesium transport protein CorA                                    | 3779991 | 3781007 |
| D-allose transport system permease protein AlsC                            | 3783197 | 3784192 |
| Transcriptional regulatory protein LiaR                                    | 3785193 | 3785819 |
| IS110 family transposase IS117                                             | 3790200 | 3791432 |
| Flavin-dependent monooxygenase, reductase subunit HsaB                     | 3796978 | 3797493 |
| Tryptophan-rich protein TspO                                               | 3798494 | 3799015 |
| HTH-type transcriptional repressor RspR                                    | 3800016 | 3800672 |
| Lipoprotein LipO                                                           | 3804462 | 3805994 |
| Glycerol-3-phosphate regulon repressor                                     | 3810168 | 3810956 |
| Multidrug efflux system permease protein                                   | 3817801 | 3819423 |
| Formate dehydrogenase subunit alpha                                        | 3820424 | 3820990 |
| Malate synthase                                                            | 4054777 | 4056375 |
| ATP synthase subunit delta                                                 | 4059027 | 4059854 |
| Intracellular exo-alpha-(1->5)-L-arabinofuranosidase                       | 4060855 | 4062381 |
| IS110 family transposase IS117                                             | 4071421 | 4072653 |
| High-affinity branched-chain amino acid transport ATP-binding protein LivF | 4076770 | 4077480 |
| Trehalose transport system permease protein SugA                           | 4084965 | 4085900 |
| Putative oxidoreductase CatD                                               | 4089930 | 4090364 |
| Potassium-transporting ATPase ATP-binding subunit                          | 4239845 | 4242439 |
| Hydroxyacylglutathione hydrolase                                           | 4248170 | 4248994 |
| Intracellular exo-alpha-(1->5)-L-arabinofuranosidase                       | 4253261 | 4254799 |
| UDP-N-acetylglucosamine 4-epimerase                                        | 4255980 | 4256729 |
| IS3 family transposase ISMsm7                                              | 4257730 | 4258017 |
| O-acetyl-L-homoserine sulfhydrylase                                        | 4266736 | 4268082 |
| FMNH(2)-dependent dimethylsulfone monooxygenase                            | 5046703 | 5047950 |
| Penicillin-binding protein 1A                                              | 5421544 | 5423763 |
| putative methyltransferase                                                 | 5424764 | 5425522 |

|                                                                        |         |         |
|------------------------------------------------------------------------|---------|---------|
| Ribosomal silencing factor RsfS                                        | 5432922 | 5433323 |
| Nitrite reductase (NADH) small subunit                                 | 5435591 | 5435974 |
| IS3 family transposase ISMsm7                                          | 5438500 | 5438787 |
| KHG/KDPG aldolase                                                      | 5439794 | 5440456 |
| UDP-3-O-(3-hydroxymyristoyl)glucosamine N-acyltransferase              | 5441457 | 5442104 |
| Guanidinium exporter                                                   | 5443105 | 5443428 |
| Putative cardiolipin synthase                                          | 5446110 | 5446733 |
| 3-oxoacyl-[acyl-carrier-protein] synthase 3                            | 5451984 | 5452967 |
| Mercuric resistance operon regulatory protein                          | 5739260 | 5739628 |
| 23S rRNA (guanosine-2'-O-)-methyltransferase RlmB                      | 5740629 | 5741438 |
| Dihydroantcapsin 7-dehydrogenase                                       | 5742439 | 5743203 |
| putative protein YihR                                                  | 5746881 | 5747783 |
| putative trans-aconitate 2-methyltransferase                           | 5748784 | 5749569 |
| 5-formyltetrahydrofolate cyclo-ligase                                  | 5751873 | 5752493 |
| Regulatory protein RecX                                                | 5753494 | 5754069 |
| IS3 family transposase ISAar26                                         | 6473359 | 6474243 |
| Homoserine/homoserine lactone efflux protein                           | 6476763 | 6477386 |
| 2-keto-3-deoxygluconate permease                                       | 6478387 | 6479376 |
| Enterobactin exporter EntS                                             | 6488105 | 6489376 |
| 5-amino-6-(5-phospho-D-ribitylamino)uracil phosphatase YitU            | 6643612 | 6644475 |
| Pyruvate dehydrogenase E1 component                                    | 6648280 | 6651048 |
| IS3 family transposase ISMsm7                                          | 6656974 | 6657261 |
| FAD:protein FMN transferase                                            | 6957303 | 6958241 |
| Putative pyridoxal phosphate-dependent aminotransferase EpsN           | 6959242 | 6960378 |
| HTH-type transcriptional repressor NagR                                | 7270458 | 7271198 |
| Shikimate kinase                                                       | 7286135 | 7286704 |
| IS3 family transposase ISBli34                                         | 7290322 | 7291134 |
| Metal cation efflux system protein CzcD                                | 7296775 | 7297692 |
| Peptide deformylase                                                    | 7749628 | 7750230 |
| HTH-type transcriptional regulator CdhR                                | 7763778 | 7764782 |
| 3-phenylpropionate-dihydrodiol/cinnamic acid-dihydrodiol dehydrogenase | 7765783 | 7766637 |
| ATP-dependent DNA helicase Rep                                         | 7769343 | 7772006 |
| Holliday junction ATP-dependent DNA helicase RuvA                      | 7773007 | 7773651 |
| putative deferrocyclase/peroxidase EfeN                                | 7783273 | 7784652 |
| Glycogen synthase                                                      | 7785653 | 7786666 |
| Tyrosine recombinase XerC                                              | 7849788 | 7850714 |
| ABC transporter glutamine-binding protein GlnH                         | 7851715 | 7852602 |
| putative alcohol dehydrogenase AdhA                                    | 7867991 | 7869010 |
| Zinc-dependent sulfurtransferase SufU                                  | 7872650 | 7873099 |

|                                                                   |         |         |
|-------------------------------------------------------------------|---------|---------|
| HTH-type transcriptional regulator DegA                           | 8007452 | 8008456 |
| Tn3 family transposase ISNpu13                                    | 8023621 | 8026587 |
| putative flavin reductase                                         | 8037440 | 8037940 |
| Multiple sugar-binding protein                                    | 8056116 | 8057402 |
| UDP-N-acetyl-D-glucosamine 6-dehydrogenase                        | 8437563 | 8438831 |
| <b>FW306-06-A</b>                                                 |         |         |
| NAD(P)H-quinone oxidoreductase subunit 3                          | 2559064 | 2559414 |
| Tyrosine recombinase XerC                                         | 2560415 | 2561542 |
| putative cation-transporting ATPase G                             | 3430649 | 3432601 |
| D-galactonate dehydratase family member RspA                      | 3433602 | 3434831 |
| Aldose sugar dehydrogenase YliI                                   | 3435832 | 3436788 |
| Putative two-component membrane permease complex subunit SMU_747c | 3441225 | 3442103 |
| putative sugar epimerase YhfK                                     | 3448672 | 3449328 |
| Multidrug resistance protein Stp                                  | 3462621 | 3464066 |
| 18 kDa heat shock protein                                         | 3465067 | 3465492 |
| Putative glutamate--cysteine ligase 2                             | 3467901 | 3469046 |
| Thymidine kinase                                                  | 3470047 | 3470775 |
| Putative transport protein                                        | 3473871 | 3475004 |
| D-galactonate dehydratase                                         | 3476005 | 3477213 |
| 3D-(3,5/4)-trihydroxycyclohexane-1,2-dione hydrolase              | 3480051 | 3482027 |
| Urease accessory protein UreD                                     | 3483028 | 3483777 |
| Dihydrolipoyl dehydrogenase                                       | 3503603 | 3505057 |
| HTH-type transcriptional regulator LutR                           | 3506058 | 3506762 |
| Glucitol operon repressor                                         | 3507763 | 3508536 |
| ECF RNA polymerase sigma factor SigL                              | 3513779 | 3514279 |
| Phosphoenolpyruvate synthase                                      | 3520340 | 3522769 |
| HTH-type transcriptional regulator XynR                           | 3527195 | 3527947 |
| Transcriptional regulator SlyA                                    | 4054902 | 4055459 |
| Glycine betaine-binding protein YehZ                              | 4060798 | 4061760 |
| 3-carboxy-cis,cis-muconate cycloisomerase                         | 4066738 | 4068210 |
| DNA-invertase hin                                                 | 4079685 | 4080338 |
| Flavoheмоprotein                                                  | 4082609 | 4084012 |
| Thiol-disulfide oxidoreductase ResA                               | 4100573 | 4101184 |
| Transcriptional regulatory protein TcrA                           | 4939683 | 4940366 |
| Iron-sulfur cluster carrier protein                               | 4942931 | 4944478 |
| IS256 family transposase ISMLu1                                   | 5085082 | 5086329 |
| IS481 family transposase ISPfr21                                  | 5087330 | 5088316 |
| putative cation efflux system protein                             | 5092613 | 5093671 |

|                                                                            |         |         |
|----------------------------------------------------------------------------|---------|---------|
| 3-keto-5-aminohexanoate cleavage enzyme                                    | 5099355 | 5100287 |
| putative HTH-type transcriptional regulator YybR                           | 5101288 | 5101662 |
| Enterobactin exporter EntS                                                 | 5105332 | 5106687 |
| Putrescine transporter PotE                                                | 5107688 | 5109190 |
| Organic hydroperoxide resistance transcriptional regulator                 | 5122344 | 5122778 |
| ATP synthase subunit b                                                     | 5219802 | 5220353 |
| HTH-type transcriptional regulator LutR                                    | 5231034 | 5231732 |
| IS21 family transposase ISLxx3                                             | 5236047 | 5236865 |
| Pyrimidine-specific ribonucleoside hydrolase RihA                          | 5237866 | 5238891 |
| NH(3)-dependent NAD(+) synthetase                                          | 5241282 | 5242157 |
| Ribosomal silencing factor RsfS                                            | 5254510 | 5254911 |
| Nicotine blue oxidoreductase                                               | 5257902 | 5258696 |
| L-lactate transporter                                                      | 7124753 | 7126138 |
| Putative ABC transporter substrate-binding protein YesO                    | 7133527 | 7134816 |
| Succinate-semialdehyde dehydrogenase                                       | 7137324 | 7138823 |
| Chromosome partition protein Smc                                           | 7145407 | 7147740 |
| Tagatose-6-phosphate kinase                                                | 7148741 | 7149763 |
| tRNA (guanine-N(7)-)-methyltransferase                                     | 7152100 | 7153023 |
| IS21 family transposase ISBmu3                                             | 7155321 | 7156088 |
| RNA polymerase-associated protein RapA                                     | 7243201 | 7247502 |
| RNA polymerase-binding transcription factor DksA                           | 7512025 | 7512384 |
| putative oxidoreductase YohF                                               | 7976725 | 7977522 |
| High-affinity branched-chain amino acid transport ATP-binding protein LivF | 7987888 | 7988598 |
| ATP-dependent RNA helicase SrmB                                            | 8391885 | 8396549 |
| <b>FW306-07-I</b>                                                          |         |         |
| IS481 family transposase ISAar35                                           | 3600490 | 3601458 |
| Metal cation efflux system protein CzcD                                    | 3602459 | 3603376 |
| Pca regulon regulatory protein                                             | 3604377 | 3605186 |
| Hydroxyacylglutathione hydrolase GloC                                      | 3606187 | 3606837 |
| Glycine cleavage system H protein                                          | 3607838 | 3608221 |
| Transcriptional regulator SlyA                                             | 3611332 | 3611862 |
| Membrane-bound lytic murein transglycosylase C                             | 5263523 | 5264902 |
| Proofreading thioesterase EntH                                             | 5275262 | 5275726 |
| IS30 family transposase ISMsm8                                             | 5317013 | 5318410 |
| Fatty acid ABC transporter ATP-binding/permease protein                    | 5322293 | 5322934 |
| D-tagatose-1,6-bisphosphate aldolase subunit GatY                          | 5323935 | 5324588 |
| Bifunctional NAD(P)H-hydrate repair enzyme Nnr                             | 5326946 | 5327905 |
| NADPH oxidoreductase                                                       | 5338273 | 5339370 |
| phosphoglycerate mutase GpmB                                               | 5340371 | 5340955 |

|                                                                 |         |         |
|-----------------------------------------------------------------|---------|---------|
| 2-succinyl-6-hydroxy-2, 4-cyclohexadiene-1-carboxylate synthase | 5341956 | 5344364 |
| 2-keto-3-deoxy-L-rhamnonate aldolase                            | 5346935 | 5347708 |
| Sensor histidine kinase DcuS                                    | 5353439 | 5355181 |
| N-(5'-phosphoribosyl)anthranilate isomerase                     | 5357500 | 5358111 |
| Tyrosine recombinase XerC                                       | 5507070 | 5509340 |
| Glucitol operon repressor                                       | 5514826 | 5515599 |
| Multidrug efflux system ATP-binding protein                     | 5519404 | 5520402 |
| Putative pre-16S rRNA nuclease                                  | 6377842 | 6378441 |
| N5-carboxyaminoimidazole ribonucleotide mutase                  | 6391185 | 6391766 |
| Tetracycline repressor protein class B from transposon Tn10     | 6392767 | 6393471 |
| Thiosulfate sulfurtransferase GlpE                              | 6400214 | 6400555 |
| 2,3-bisphosphoglycerate-dependent phosphoglycerate mutase       | 6983147 | 6983938 |
| Methionine aminopeptidase 1                                     | 6986956 | 6987729 |
| Sulfurtransferase                                               | 6988730 | 6989026 |
| putative amino acid permease YhdG                               | 6995977 | 6997503 |
| IS110 family transposase ISAar41                                | 6999708 | 7000757 |
| Heat shock protein 15                                           | 7085497 | 7085880 |
| Oxidoreductase YdhF                                             | 7086881 | 7087822 |
| lipid kinase YegS                                               | 7088823 | 7089902 |
| IS481 family transposase ISAar35                                | 7092527 | 7093495 |

Table S4. Results of the carbon utilization assay for all seven isolates. OD<sub>600</sub> values are the mean of three biological replicates. The color scale correlates with OD<sub>600</sub> from low (white) to high (red). Carbon sources are grouped by compound type.

|                | 123  | BF8  | D06B | 04-A | 05-C | 06-A | 07-I |
|----------------|------|------|------|------|------|------|------|
| cytosine       | 0.14 | 0.07 | 0.11 | 0.20 | 0.08 | 0.10 | 0.08 |
| thymidine      | 0.12 | 0.12 | 0.19 | 0.12 | 0.16 | 0.10 | 0.09 |
| inosine        | 0.65 | 0.22 | 0.35 | 0.11 | 0.08 | 0.09 | 0.08 |
| cytidine       | 0.26 | 0.08 | 0.33 | 0.14 | 0.08 | 0.09 | 0.08 |
| uridine        | 0.67 | 0.16 | 0.28 | 0.31 | 0.12 | 0.17 | 0.08 |
| adenosine      | 0.65 | 0.14 | 0.24 | 0.13 | 0.09 | 0.13 | 0.14 |
| adenine        | 0.11 | 0.17 | 0.18 | 0.11 | 0.10 | 0.16 | 0.08 |
| tryptophan     | 0.14 | 0.20 | 0.22 | 0.13 | 0.13 | 0.19 | 0.10 |
| arginine       | 0.53 | 0.14 | 0.19 | 0.22 | 0.23 | 0.27 | 0.23 |
| asparagine     | 0.55 | 0.18 | 0.31 | 0.31 | 0.30 | 0.33 | 0.38 |
| aspartate      | 0.16 | 0.08 | 0.12 | 0.22 | 0.08 | 0.13 | 0.10 |
| glutamate      | 0.28 | 0.10 | 0.20 | 0.23 | 0.09 | 0.11 | 0.14 |
| histidine      | 0.76 | 0.16 | 0.42 | 0.42 | 0.26 | 0.40 | 0.55 |
| glutamine      | 0.66 | 0.18 | 0.36 | 0.42 | 0.32 | 0.30 | 0.44 |
| cysteine       | 0.13 | 0.08 | 0.15 | 0.11 | 0.13 | 0.12 | 0.09 |
| tyrosine       | 0.11 | 0.08 | 0.42 | 0.30 | 0.48 | 0.39 | 0.08 |
| serine         | 0.28 | 0.08 | 0.12 | 0.15 | 0.09 | 0.16 | 0.11 |
| proline        | 0.22 | 0.15 | 0.20 | 0.27 | 0.18 | 0.21 | 0.25 |
| isoleucine     | 0.11 | 0.07 | 0.12 | 0.10 | 0.08 | 0.10 | 0.08 |
| methionine     | 0.12 | 0.16 | 0.17 | 0.11 | 0.16 | 0.14 | 0.07 |
| phenylalanine  | 0.13 | 0.17 | 0.20 | 0.11 | 0.10 | 0.14 | 0.08 |
| citrulline     | 0.12 | 0.16 | 0.36 | 0.11 | 0.10 | 0.17 | 0.08 |
| glucosamine    | 0.41 | 0.25 | 0.46 | 0.41 | 0.35 | 0.37 | 0.39 |
| casamino acids | 0.47 | 0.30 | 0.50 | 0.40 | 0.32 | 0.49 | 0.40 |
| xylitol        | 0.11 | 0.14 | 0.15 | 0.14 | 0.08 | 0.10 | 0.08 |
| mannitol       | 0.11 | 0.29 | 0.67 | 0.10 | 0.43 | 0.54 | 0.58 |
| ducitol        | 0.11 | 0.07 | 0.10 | 0.17 | 0.09 | 0.22 | 0.09 |
| myo-inositol   | 0.12 | 0.12 | 0.17 | 0.10 | 0.09 | 0.20 | 0.10 |
| acetate        | 0.25 | 0.12 | 0.17 | 0.14 | 0.20 | 0.21 | 0.21 |
| malate         | 0.49 | 0.19 | 0.23 | 0.26 | 0.33 | 0.39 | 0.29 |
| folate         | 0.23 | 0.17 | 0.67 | 0.66 | 0.72 | 0.69 | 0.38 |
| succinate      | 0.74 | 0.19 | 0.35 | 0.25 | 0.27 | 0.34 | 0.26 |
| propionate     | 0.12 | 0.11 | 0.16 | 0.16 | 0.21 | 0.25 | 0.20 |
| formate        | 0.12 | 0.15 | 0.19 | 0.11 | 0.08 | 0.15 | 0.08 |
| butyrate       | 0.12 | 0.08 | 0.16 | 0.23 | 0.14 | 0.22 | 0.22 |
| fumarate       | 0.20 | 0.18 | 0.19 | 0.11 | 0.12 | 0.16 | 0.12 |
| citrate        | 0.24 | 0.21 | 0.31 | 0.19 | 0.25 | 0.41 | 0.31 |
| lactate        | 0.35 | 0.19 | 0.23 | 0.13 | 0.22 | 0.39 | 0.39 |
| pyruvate       | 0.37 | 0.21 | 0.28 | 0.16 | 0.30 | 0.42 | 0.35 |
| glycolic acid  | 0.11 | 0.16 | 0.16 | 0.11 | 0.15 | 0.16 | 0.08 |
| nicotinic acid | 0.12 | 0.10 | 0.09 | 0.11 | 0.08 | 0.10 | 0.08 |
| pthalate       | 0.12 | 0.08 | 0.10 | 0.11 | 0.08 | 0.10 | 0.08 |
| sucrose        | 0.12 | 0.36 | 0.75 | 0.61 | 0.50 | 0.59 | 0.50 |
| glucose        | 0.86 | 0.46 | 0.68 | 0.57 | 0.48 | 0.63 | 0.54 |
| lactose        | 0.18 | 0.32 | 0.39 | 0.30 | 0.24 | 0.19 | 0.18 |
| ribose         | 0.14 | 0.18 | 0.18 | 0.14 | 0.18 | 0.17 | 0.24 |
| mannose        | 0.32 | 0.27 | 0.23 | 0.12 | 0.21 | 0.32 | 0.28 |
| fructose       | 0.97 | 0.37 | 0.65 | 0.53 | 0.59 | 0.65 | 0.59 |
| rhamnose       | 0.13 | 0.15 | 0.16 | 0.11 | 0.09 | 0.14 | 0.09 |
| maltose        | 0.34 | 0.21 | 0.30 | 0.12 | 0.52 | 0.42 | 0.40 |
| arabinose      | 0.17 | 0.10 | 0.11 | 0.11 | 0.11 | 0.25 | 0.20 |
| cellobiose     | 0.52 | 0.26 | 0.30 | 0.12 | 0.35 | 0.48 | 0.34 |
| cellulose      | 0.11 | 0.10 | 0.10 | 0.11 | 0.08 | 0.10 | 0.08 |
| glucuronamide  | 0.27 | 0.21 | 0.26 | 0.25 | 0.20 | 0.27 | 0.20 |
| urea           | 0.12 | 0.08 | 0.10 | 0.11 | 0.08 | 0.10 | 0.08 |
| tryptone       | 0.47 | 0.17 | 0.22 | 0.14 | 0.32 | 0.32 | 0.17 |
| R2A            | 0.68 | 0.37 | 0.60 | 0.53 | 0.51 | 0.54 | 0.52 |
| TSB            | 0.98 | 0.48 | 0.75 | 0.70 | 0.56 | 0.68 | 0.60 |
| no C source    | 0.12 | 0.08 | 0.09 | 0.10 | 0.09 | 0.09 | 0.08 |
| no cells       | 0.09 | 0.07 | 0.09 | 0.08 | 0.08 | 0.09 | 0.09 |

Table S5. Predicted genomic capability to catabolism 62 simple carbon substrates of the seven isolates presented in this study, listed alphabetically. A (+) indicates a high confidence prediction, (m) indicates a medium-confidence prediction, and (-) indicates a low confidence prediction, per default GapMind standards (Price et al., 2019).

|                   | Groundwater |     | Sediment |      |      |      |      |
|-------------------|-------------|-----|----------|------|------|------|------|
|                   | 123         | BF8 | D06B     | 04-A | 05-C | 06-A | 07-I |
| acetate           | +           | +   | +        | +    | +    | +    | +    |
| D-alanine         | -           | -   | -        | -    | -    | -    | -    |
| alanine           | +           | +   | +        | m    | +    | +    | +    |
| arabinose         | +           | +   | +        | +    | +    | +    | +    |
| arginine          | m           | -   | -        | -    | -    | -    | -    |
| asparagine        | +           | +   | +        | +    | +    | +    | +    |
| aspartate         | m           | m   | m        | m    | m    | m    | m    |
| cellobiose        | +           | +   | +        | +    | +    | +    | +    |
| citrate           | -           | +   | +        | +    | +    | +    | +    |
| citrulline        | -           | -   | -        | -    | -    | -    | -    |
| deoxyinosine      | -           | -   | -        | -    | -    | -    | -    |
| deoxyribonate     | -           | -   | -        | -    | -    | +    | -    |
| deoxyribose       | -           | -   | -        | -    | -    | -    | -    |
| ethanol           | +           | m   | +        | +    | m    | m    | m    |
| fructose          | m           | m   | m        | m    | m    | m    | m    |
| fucose            | -           | -   | -        | -    | -    | -    | -    |
| fumarate          | +           | +   | +        | +    | +    | +    | +    |
| galactose         | m           | +   | m        | m    | +    | +    | +    |
| galacturonate     | -           | -   | -        | -    | m    | -    | -    |
| gluconate         | +           | m   | +        | +    | -    | m    | m    |
| glucose           | +           | +   | +        | +    | +    | +    | +    |
| glucose-6-P       | -           | -   | -        | -    | -    | -    | -    |
| glucosamine       | -           | -   | -        | -    | -    | -    | -    |
| glucuronate       | -           | -   | -        | -    | -    | -    | -    |
| glutamate         | m           | m   | m        | m    | m    | m    | m    |
| glycerol          | m           | m   | m        | m    | m    | m    | m    |
| histidine         | m           | m   | m        | +    | m    | m    | m    |
| isoleucine        | -           | -   | m        | -    | m    | m    | m    |
| 4-hydroxybenzoate | -           | -   | -        | -    | -    | -    | -    |
| D-lactate         | m           | m   | m        | -    | m    | m    | m    |
| L-lactate         | +           | +   | m        | +    | +    | +    | +    |
| lactose           | -           | -   | -        | -    | -    | -    | -    |
| leucine           | -           | -   | -        | -    | m    | m    | m    |
| lysine            | -           | m   | -        | -    | -    | -    | -    |
| L-malate          | +           | +   | +        | +    | +    | +    | +    |
| maltose           | +           | +   | +        | +    | +    | +    | +    |
| mannitol          | +           | +   | +        | +    | +    | +    | +    |
| mannose           | m           | m   | -        | -    | m    | m    | m    |
| myoinositol       | -           | -   | -        | -    | -    | -    | -    |
| NAG               | -           | -   | -        | -    | -    | -    | -    |
| 2-oxoglutarate    | +           | +   | m        | +    | +    | +    | +    |
| phenylacetate     | m           | -   | m        | m    | m    | m    | m    |
| phenylalanine     | m           | -   | m        | m    | m    | m    | m    |
| proline           | -           | -   | -        | -    | m    | -    | -    |
| propionate        | +           | +   | +        | +    | +    | +    | +    |
| putrescine        | m           | m   | m        | m    | -    | m    | m    |
| pyruvate          | +           | +   | +        | +    | +    | +    | +    |
| rhamnose          | -           | m   | m        | -    | -    | -    | -    |
| ribose            | +           | m   | -        | -    | -    | -    | -    |
| D-serine          | -           | -   | -        | -    | -    | -    | -    |
| serine            | m           | m   | -        | -    | -    | -    | -    |
| sorbitol          | -           | m   | -        | m    | -    | m    | m    |
| succinate         | +           | +   | +        | +    | +    | +    | +    |
| sucrose           | +           | +   | +        | +    | +    | +    | +    |
| threonine         | m           | m   | m        | m    | m    | m    | m    |
| thymidine         | -           | -   | -        | -    | -    | -    | -    |
| trehalose         | m           | m   | m        | m    | m    | m    | m    |
| tryptophan        | -           | -   | -        | -    | -    | -    | -    |
| tyrosine          | -           | -   | -        | -    | -    | -    | -    |
| valine            | -           | -   | m        | -    | -    | -    | -    |
| xylitol           | -           | -   | -        | -    | -    | -    | -    |
| xylose            | m           | +   | +        | m    | +    | +    | +    |

Table S6. 34 Publicly available *Arthrobacter* included in the pangenome analysis. For any publicly available isolate without a publication reference, environment of origin was obtained from the NCBI metadata associated with the given accession number.

| No. | Strain                                         | Accession Number | Environment of Origin | Publication Reference       |
|-----|------------------------------------------------|------------------|-----------------------|-----------------------------|
| 1   | <i>Arthrobacter nitroguajacolicus</i> Rue61a   | GCA_000294695    | Wastewater            | (Niewerth et al., 2012)     |
| 2   | <i>Arthrobacter alpinus</i> R3.8               | GCA_001294625.1  | Permafrost            | (See-Too et al., 2017)      |
| 3   | <i>Arthrobacter alpinus</i> A3                 | GCA_000755585.2  | Permafrost            |                             |
| 4   | <i>Arthrobacter alpinus</i> ERGS4:06           | GCA_001445575.1  | Freshwater            | (Kumar et al., 2016)        |
| 5   | <i>Arthrobacter</i> sp. ERGS1:01               | GCA_001281315.1  | Environmental         |                             |
| 6   | <i>Arthrobacter</i> sp. ATCC 21022             | GCA_001542565.1  | Soil                  | (Russell and Hatfull, 2016) |
| 7   | <i>Arthrobacter</i> sp. ZXY-2                  | GCA_001854365.1  | Soil                  |                             |
| 8   | <i>Arthrobacter</i> sp. U41                    | GCA_001750145.1  | Freshwater            | (Fomenkov et al., 2017)     |
| 9   | <i>Arthrobacter</i> sp. Hiyo8                  | GCA_001549895.1  | Soil                  | (Hiraoka et al., 2016)      |
| 10  | <i>Arthrobacter</i> sp. QXT-31                 | GCA_001969265.1  | Soil                  |                             |
| 11  | <i>Arthrobacter</i> sp. YN                     | GCA_002224285.1  | Environmental         |                             |
| 12  | <i>Arthrobacter</i> sp. Hiyo4                  | GCA_002370555.1  | Soil                  | (Hiraoka et al., 2016)      |
| 13  | <i>Arthrobacter crystallopoietes</i> DSM 20117 | GCA_002849715.1  | Soil                  |                             |
| 14  | <i>Arthrobacter agilis</i> UMCV2               | GCA_002953615.1  | Rhizosphere           |                             |
| 15  | <i>Arthrobacter</i> sp. PAMC25564              | GCA_004798705.1  | Soil                  | (Han et al., 2021)          |
| 16  | <i>Arthrobacter dokdonellae</i> DCT5           | GCA_003268655.1  | Environmental         | (Koh et al., 2019)          |
| 17  | <i>Arthrobacter</i> sp. MN0502                 | GCA_004001285.1  | Desert soil           |                             |
| 18  | <i>Arthrobacter</i> sp. KBS0702                | GCA_005937985.2  | Soil                  |                             |
| 19  | <i>Arthrobacter</i> sp. UKPF54-2               | GCA_007858535.1  | Soil                  |                             |
| 20  | <i>Arthrobacter</i> sp. TES                    | GCA_014863565.1  | Soil                  |                             |
| 21  | <i>Arthrobacter</i> sp. PAMC 25486             | GCA_000785535.1  | Arctic soil           |                             |
| 22  | <i>Arthrobacter</i> sp. PGP41                  | GCA_002953935.1  | Rhizosphere           | (Xu et al., 2018)           |
| 23  | <i>Arthrobacter</i> sp. 24S4-2                 | GCA_005280255.1  | Environmental         |                             |
| 24  | <i>Arthrobacter</i> sp. AQ5-05                 | GCA_009707285.1  | Arctic soil           | (Lee et al., 2018)          |
| 25  | <i>Arthrobacter</i> sp. D5-1                   | GCA_017357425.1  | Soil                  | (Bazhanov et al., 2016)     |
| 26  | <i>Arthrobacter crystallopoietes</i> NT16      | GCA_017603825.1  | Environmental         | (Fan et al. 2019)           |
| 27  | <i>Arthrobacter</i> sp. FB24                   | GCA_000196235.1  | Soil                  | (Nakatsu et al., 2013)      |
| 28  | <i>Arthrobacter</i> sp. NicSoilB11             | GCA_019977375.1  | Soil                  | (Shimasaki et al., 2021)    |
| 29  | <i>Arthrobacter</i> sp. NicSoilB8              | GCA_019977355.1  | Soil                  | (Shimasaki et al., 2021)    |
| 30  | <i>Arthrobacter</i> sp. NtRootA9               | GCA_019977115.1  | Endosphere            | (Shimasaki et al., 2021)    |
| 31  | <i>Arthrobacter</i> sp. NicSoilC5              | GCA_019977395.1  | Soil                  | (Shimasaki et al., 2021)    |
| 32  | <i>Arthrobacter</i> sp. NicSoilB4              | GCA_019977335.1  | Soil                  | (Shimasaki et al., 2021)    |
| 33  | <i>Arthrobacter</i> sp. NicSoilE8              | GCA_019977415.1  | Soil                  | (Shimasaki et al., 2021)    |
| 34  | <i>Arthrobacter</i> sp. NtRootA1               | GCA_019976975.1  | Endosphere            | (Shimasaki et al., 2021)    |



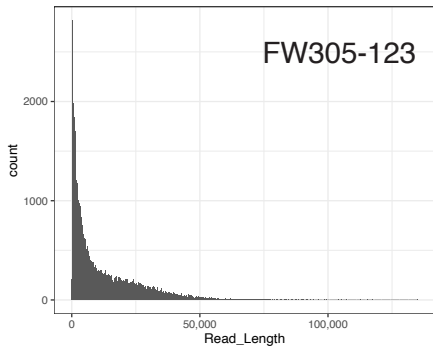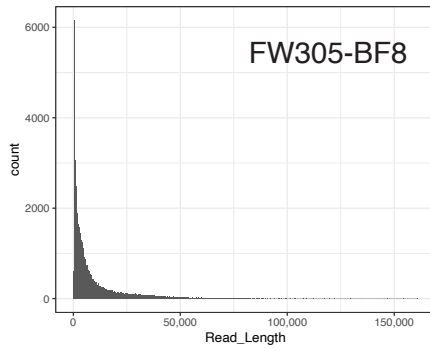

Ground water isolates

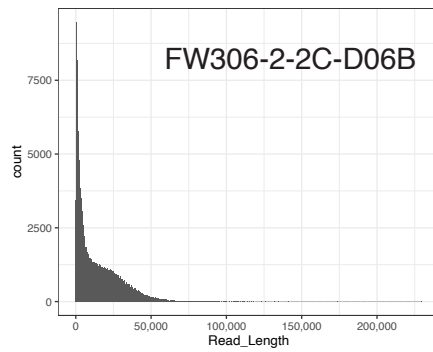

Vadose zone isolate

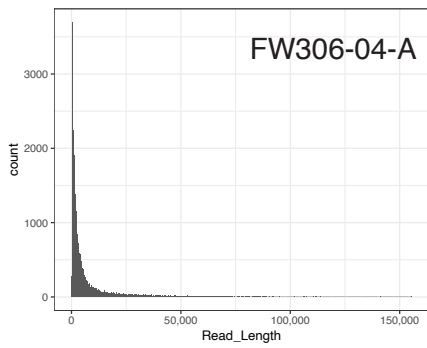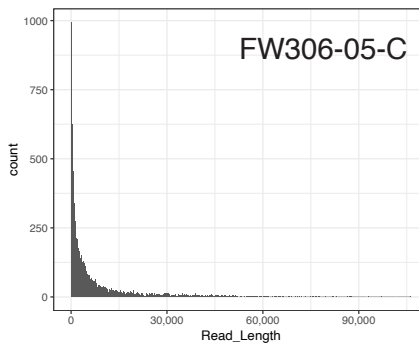

Variable Saturated Zone Isolates

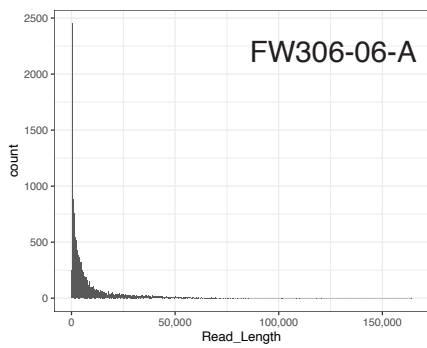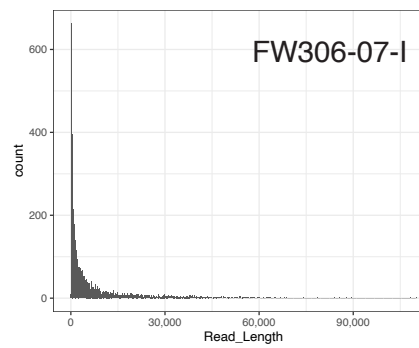

Saturated Zone Isolates

Figure S1. Long read distribution of Oxford Nanopore Technologies sequencing reads.

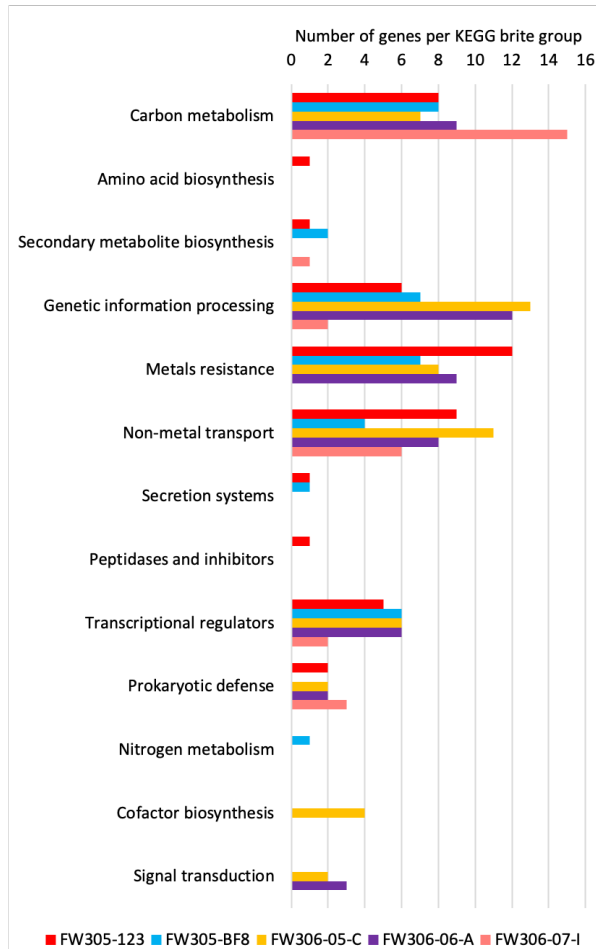

Figure S2. Protein-coding genes in plasmids of strains FW305-123, FW305-BF8, FW306-05-C, FW306-06-A, and FW306-07-I organized by KEGG brite group. Strains FW306-2-2C-D06B and FW306-04-A do not possess plasmids and are therefore omitted. Genes not mapping to a KEGG brite group are also omitted from this plot.

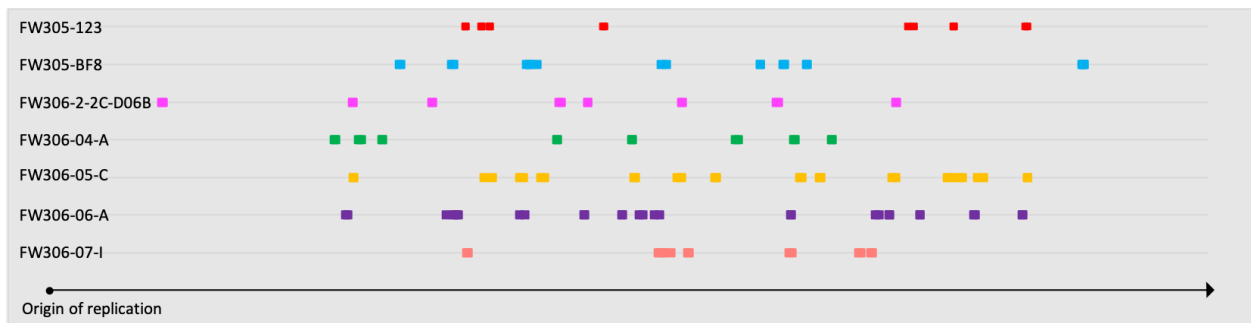

Figure S3. Predicted genomic islands in the seven *Arthrobacter* isolates mapped on their respective genomes beginning at the origin of replication (left). The genomes of groundwater strains 123 and BF8 contained 7 and 10 genomic islands, respectively. The genomes of sediment strains D06B, 04-A, 05-C, 06-A, and 07-I contained 8, 8, 14, 14, and 7 genomic islands, respectively.

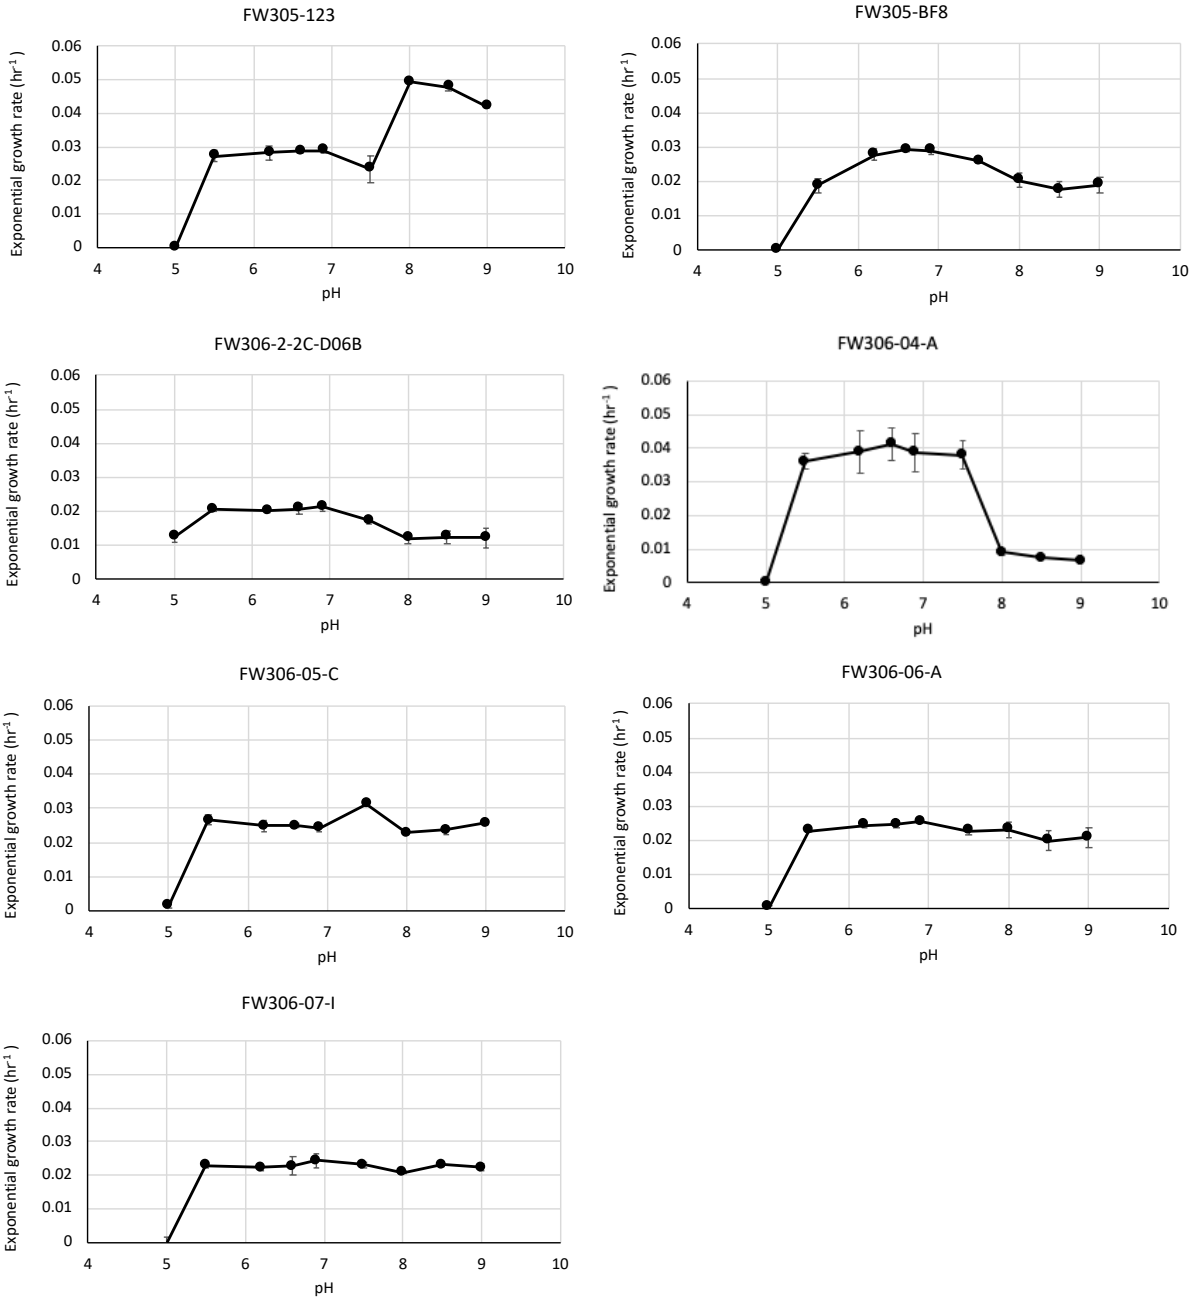

Figure S4. Exponential growth rates (in units of hr<sup>-1</sup>) of isolates FW305-123, FW305-BF8, FW306-2-2C-D06B, FW306-04-A, FW306-05-C, FW306-06-A, and FW306-07-I over pH ranging from 5 to 9. Markers represent the mean of three biological replicates. Error bars indicate one standard deviation from the mean. Absence of error bars indicate the error is smaller than the marker.

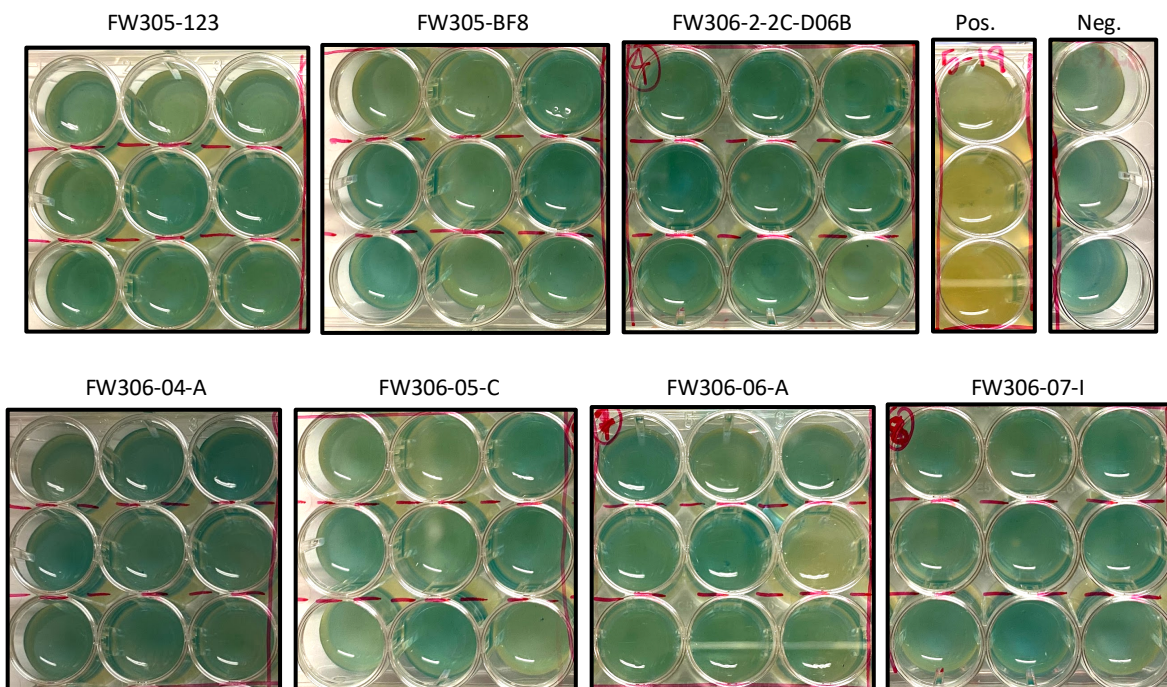

Figure S5. Images of colorimetric, overlay-chrome azurol S siderophore assay for the seven isolates (nine replicates) including positive control (Pos., three replicates) and negative control (Neg., three replicates). A resulting purple color indicated catechol-type siderophore production, yellow indicated hydroxamate-type siderophore production, red-orange indicated a mix of different siderophore types, and blue indicated the absence of detected siderophore production.

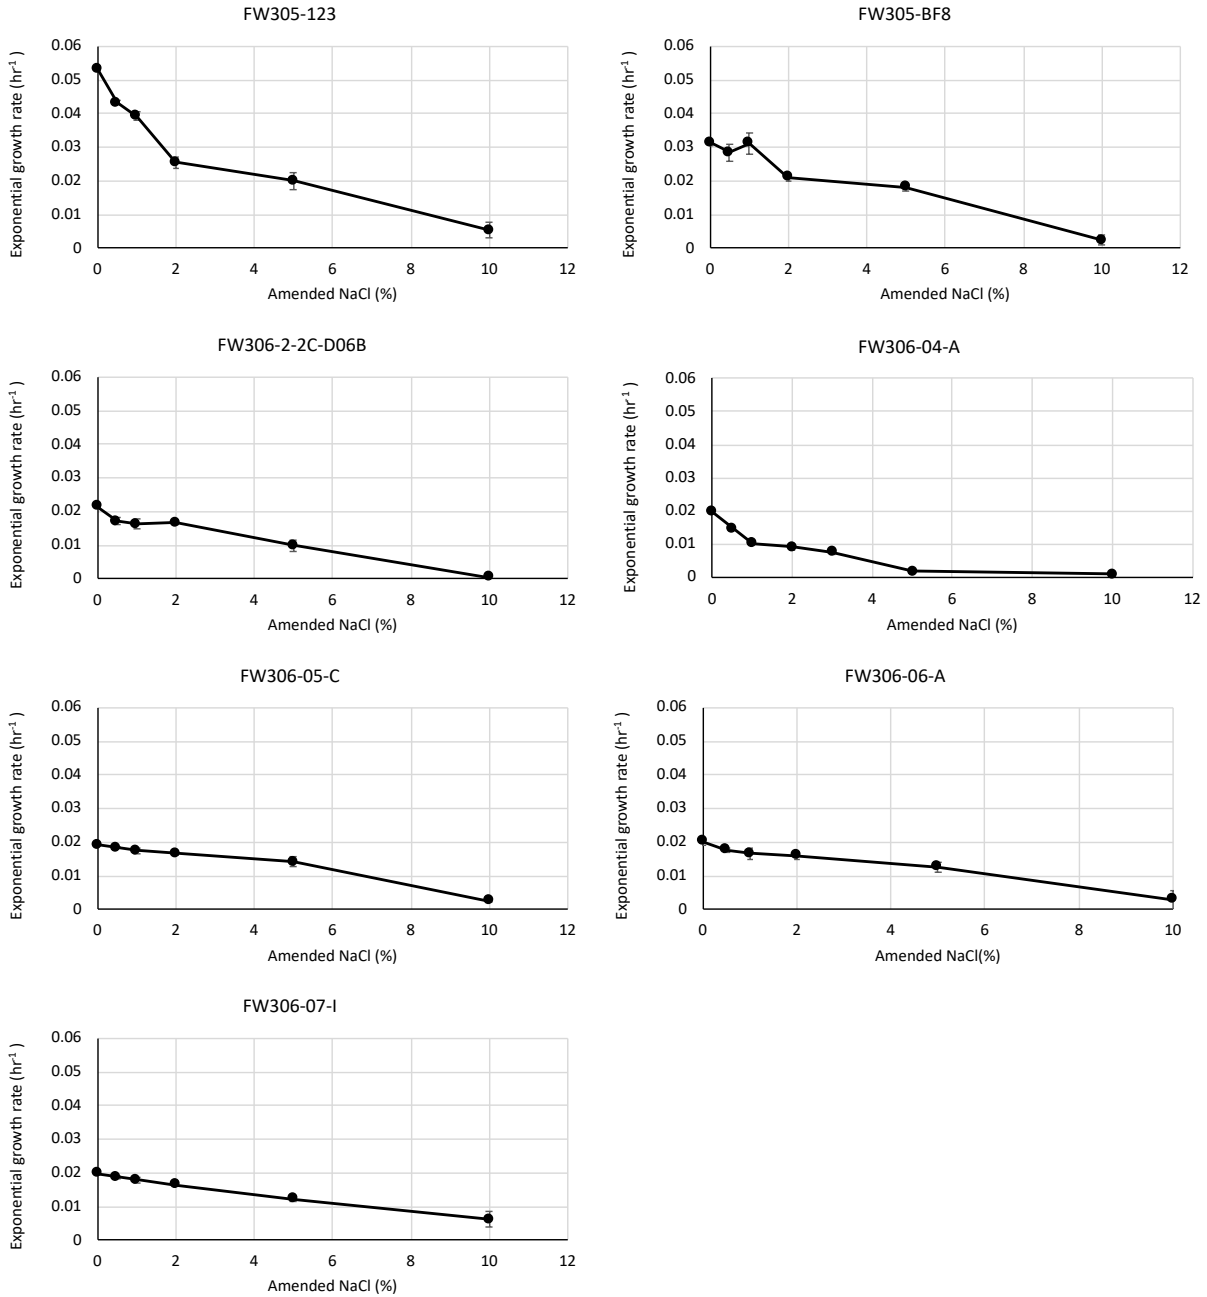

Figure S6. Exponential growth rates (in units of  $\text{hr}^{-1}$ ) of isolates FW305-123, FW305-BF8, FW306-2-2C-D06B, FW306-05-C, FW306-06-A, and FW306-07-I over variable salinity ranging from 0.5% to 10% (w/v) amended to RCH2 mineral medium. Markers represent the mean of three biological replicates. Error bars indicate one standard deviation from the mean. Absence of error bars indicate the error is smaller than the marker.

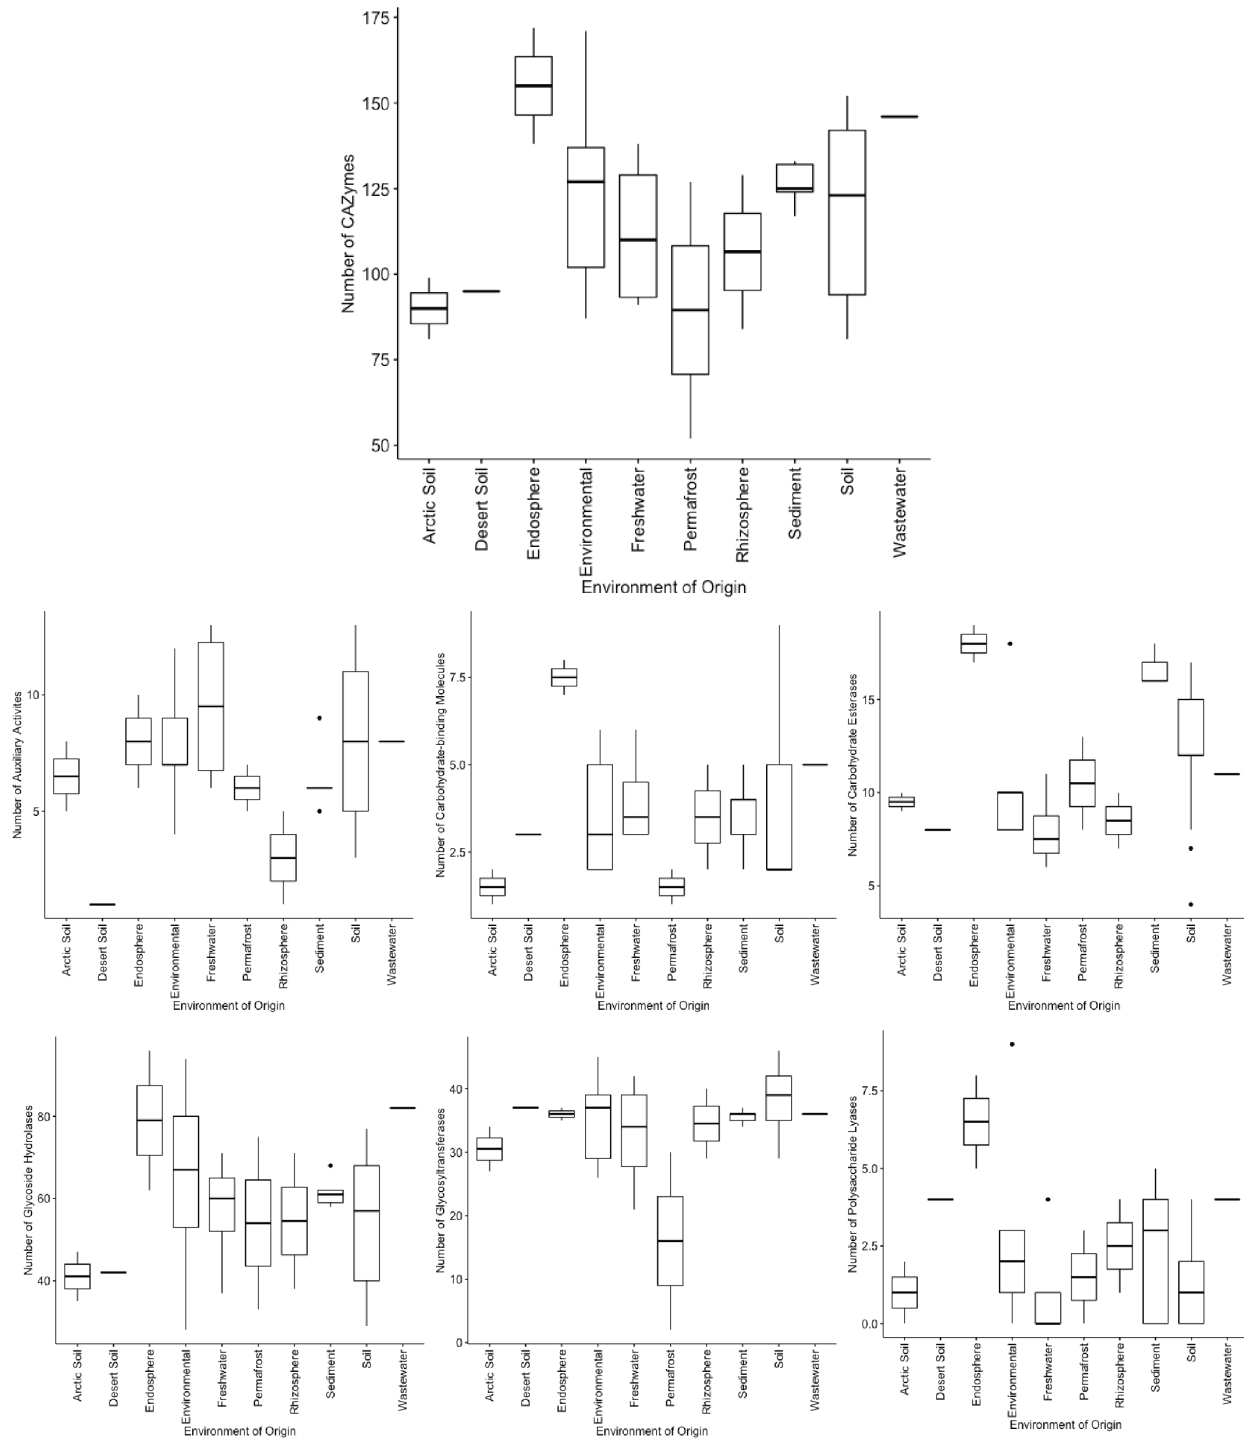

Figure S7. Box plots summarizing the predicted total CAZymes, auxiliary activities, carbohydrate-binding molecules, carbohydrate esterases, glycoside hydrolases, glycosyltransferases, and polysaccharide lyases by environment of origin. Differences in each category by environment of origin was evaluated via one-way ANOVA, with significant differences observed in carbohydrate esterases ( $p=0.00298$ ) and glycosyltransferases ( $p=0.0237$ ).

Supplemental Information File 2: Original 16S rRNA alignment of 41 *Arthrobacter* and 1 *Glutamicibacter* outgroup in fasta format.

Supplemental Information File 3: Trimmed 16S rRNA alignment of 41 *Arthrobacter* and 1 *Glutamicibacter* outgroup in fasta format.

Supplemental Information File 4: Phylogenetic tree of 41 *Arthrobacter* and 1 *Glutamicibacter* outgroup in Newick format.
